# Supplementary material
Source: publisher figshare collection journal article supplement (https://acs.figshare.com/ndownloader/files/4603816)
Supplement: Supplementary file 1 [file 4603816]

## Supporting information

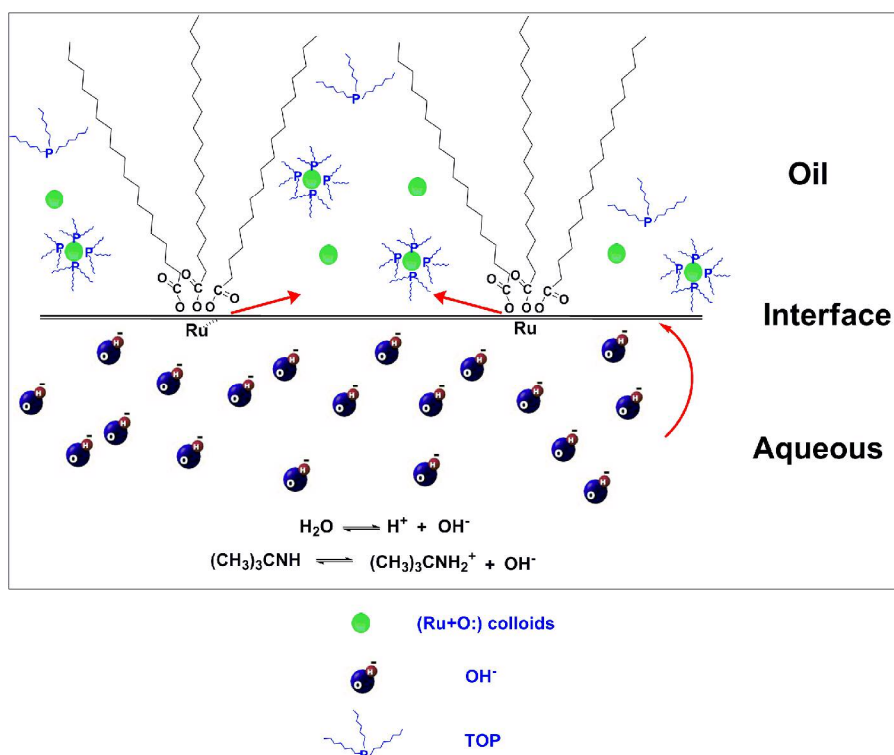

**Figure S1.** A probable reaction mechanism in the two phase route.

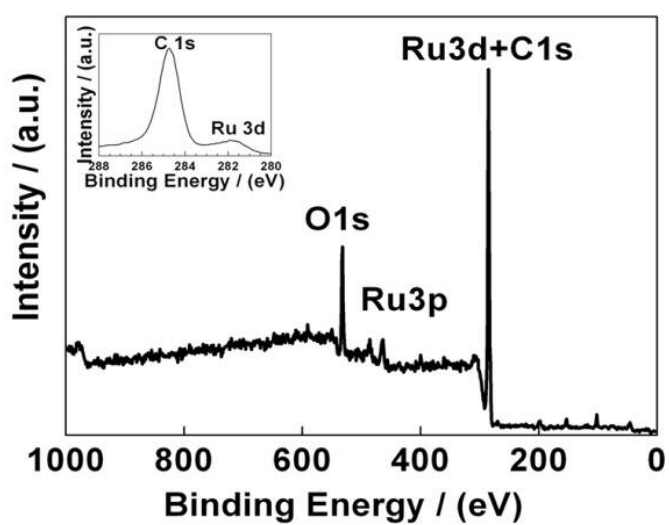

**Figure S2.** Full XPS spectrum (up) and local magnification for Ru 3d and C 1s peaks of sample prepared at 180 °C for 6 h.

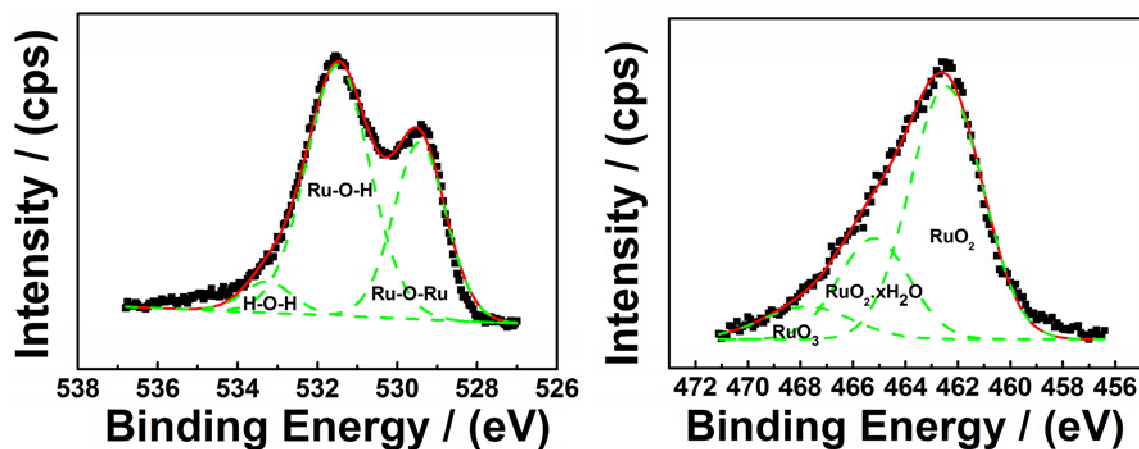

**Figure S3.** XPS spectrum of O 1s (left) and Ru 3p<sub>3/2</sub> (right) for as-prepared RuO<sub>2</sub>·xH<sub>2</sub>O sample. The scatter, dashed and solid lines are the experiment, fitting and resultant spectra, respectively.

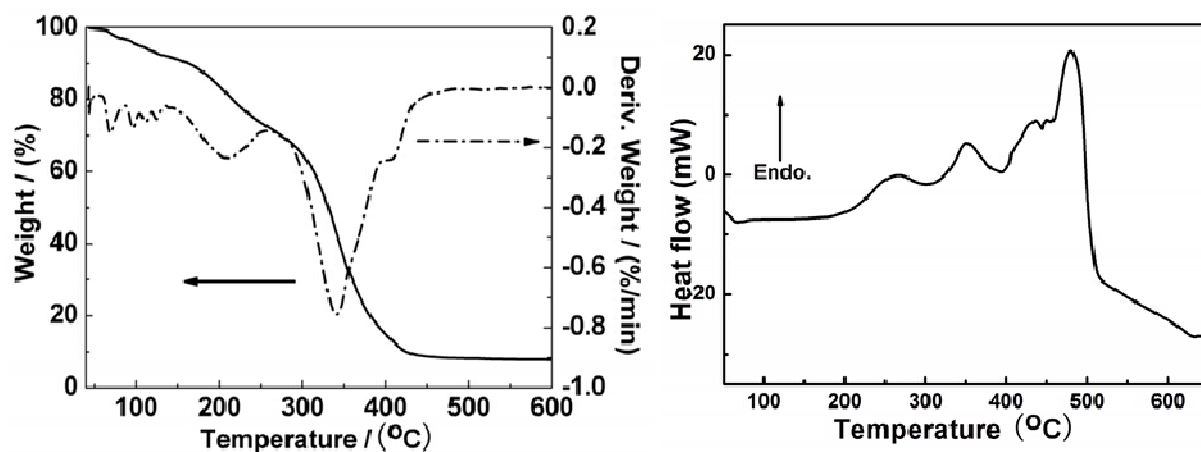

**Figure S4.** TGA (left) curve (solid), the differential plot (dash dot) and DTA (right) curve of as-prepared RuO<sub>2</sub>·xH<sub>2</sub>O samples.

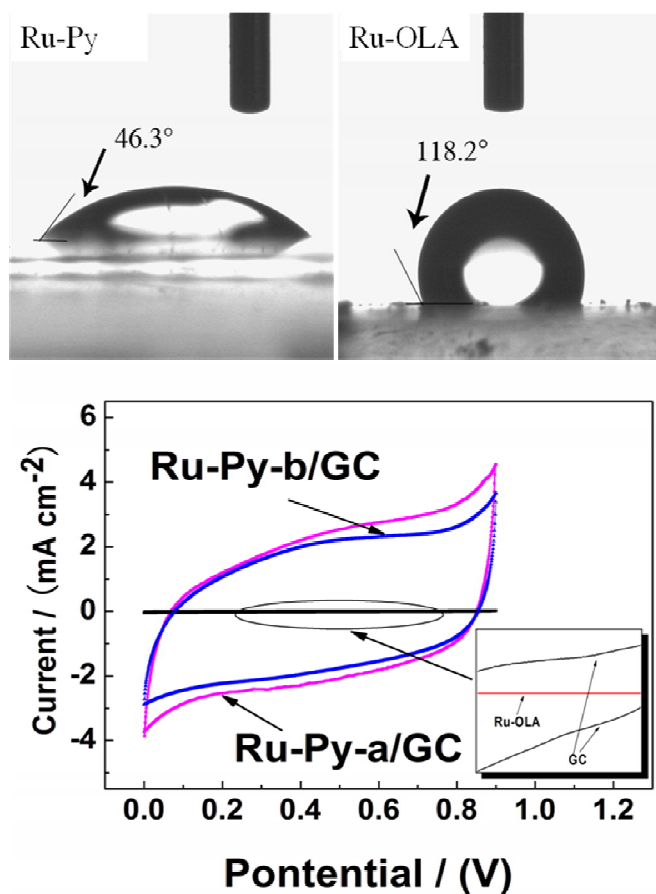

**Figure S5.** Water contact angle of Ru-OLA and Ru-Py samples, and cyclic voltammograms at a scan rate of  $50\text{mVs}^{-1}$  of bare GC, Ru-OLA, Ru-Py-a, and Ru-Py-b modified GC, respectively. The shadowed square inset is local magnification of the elliptical zones.
